# Supplementary material for: Isotopomeric polymorphism in a “doubly-polymorphic” multi-component molecular crystal
Source: Royal Society of Chemistry journal article supplement (doi:10.1039/c5ce00123d), 2015-01-01
Supplement: c5ce00123d1.pdf [file c5ce00123d1.pdf]

## Isotopomeric polymorphism in a “doubly-polymorphic” multi-component molecular crystal

Marc Schmidtman, Derek S. Middlemiss and Chick C. Wilson

ESI

Figure ESI\_1 – IR spectrum of IN<sub>2</sub>-d-OA Form I, showing absence of N–H stretch

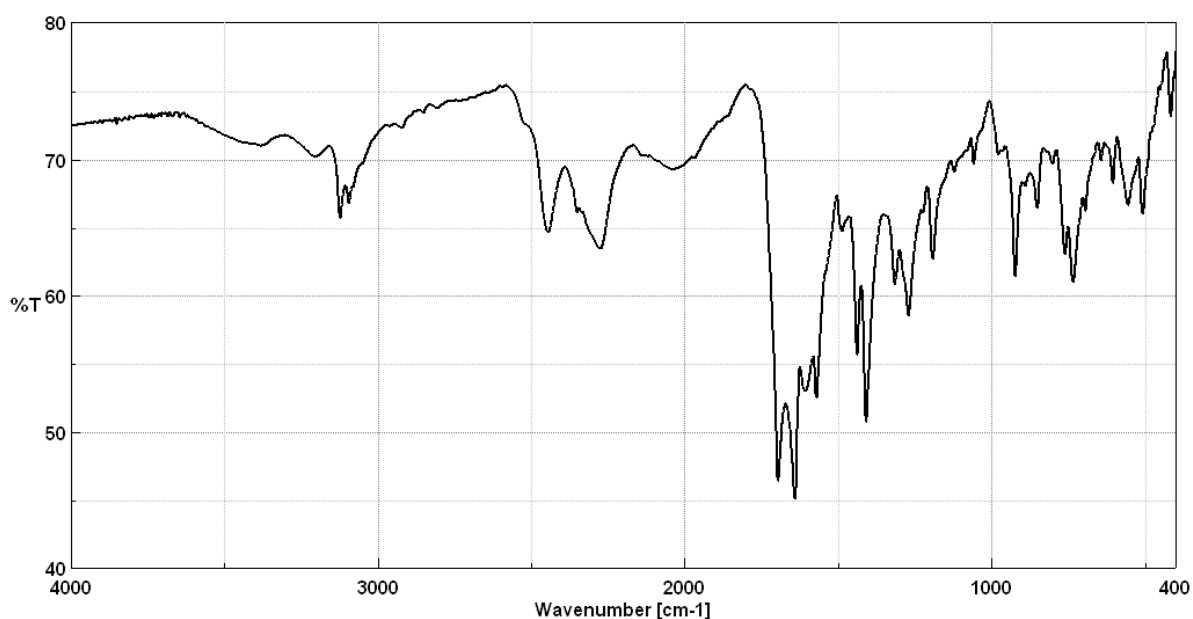

IR spectrum (KBr) of IN<sub>2</sub>-d-OA Form I. 3123 + 3095 (w) C–H stretch; 2445 + 2277 (m) N–D stretch; 2040 (br) N–D...O HB; 1696 (s) C=O amide stretch; 1640 (s) CO<sub>2</sub><sup>-</sup> asymmetric stretch; 1607 + 1572 (w) N–D bend; 1439 (s) CO<sub>2</sub><sup>-</sup> symmetric stretch; 1409 (s) C–N stretch

## Fourier difference maps for IN<sub>2</sub>-d-OA Forms I and II

### Form I

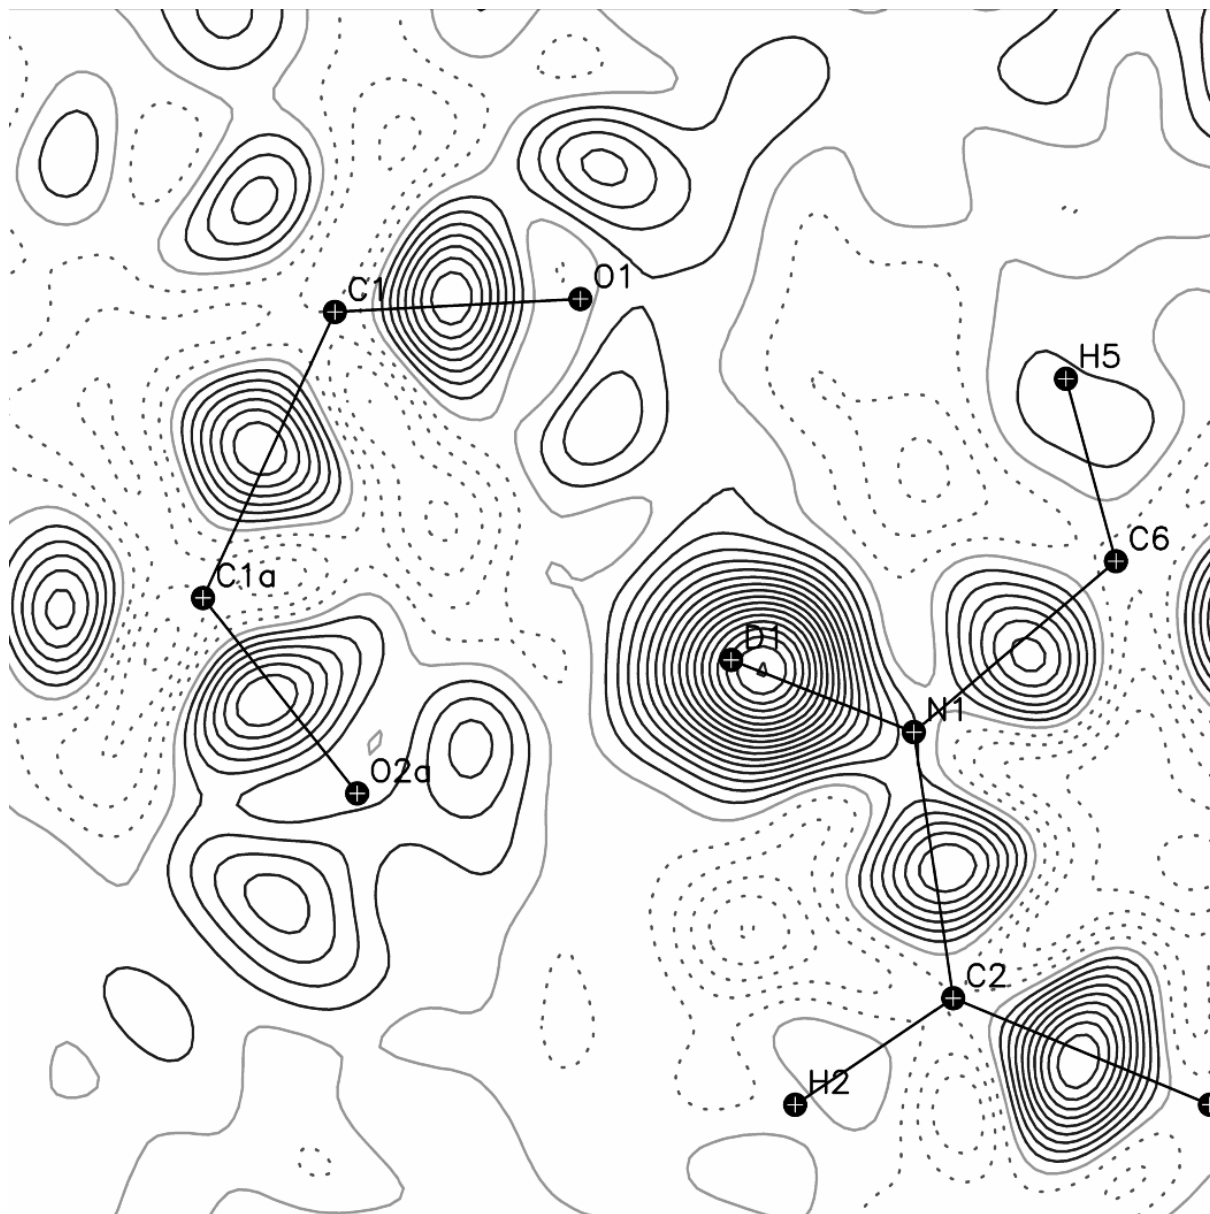

Difference Fourier map in the O1–N1–O2a plane of IN<sub>2</sub>-d-OA Form I;  $\sin\theta/\lambda < 0.78 \text{ \AA}^{-1}$ , clearly showing D1 to be transferred from the oxalic acid moiety.

## Form II

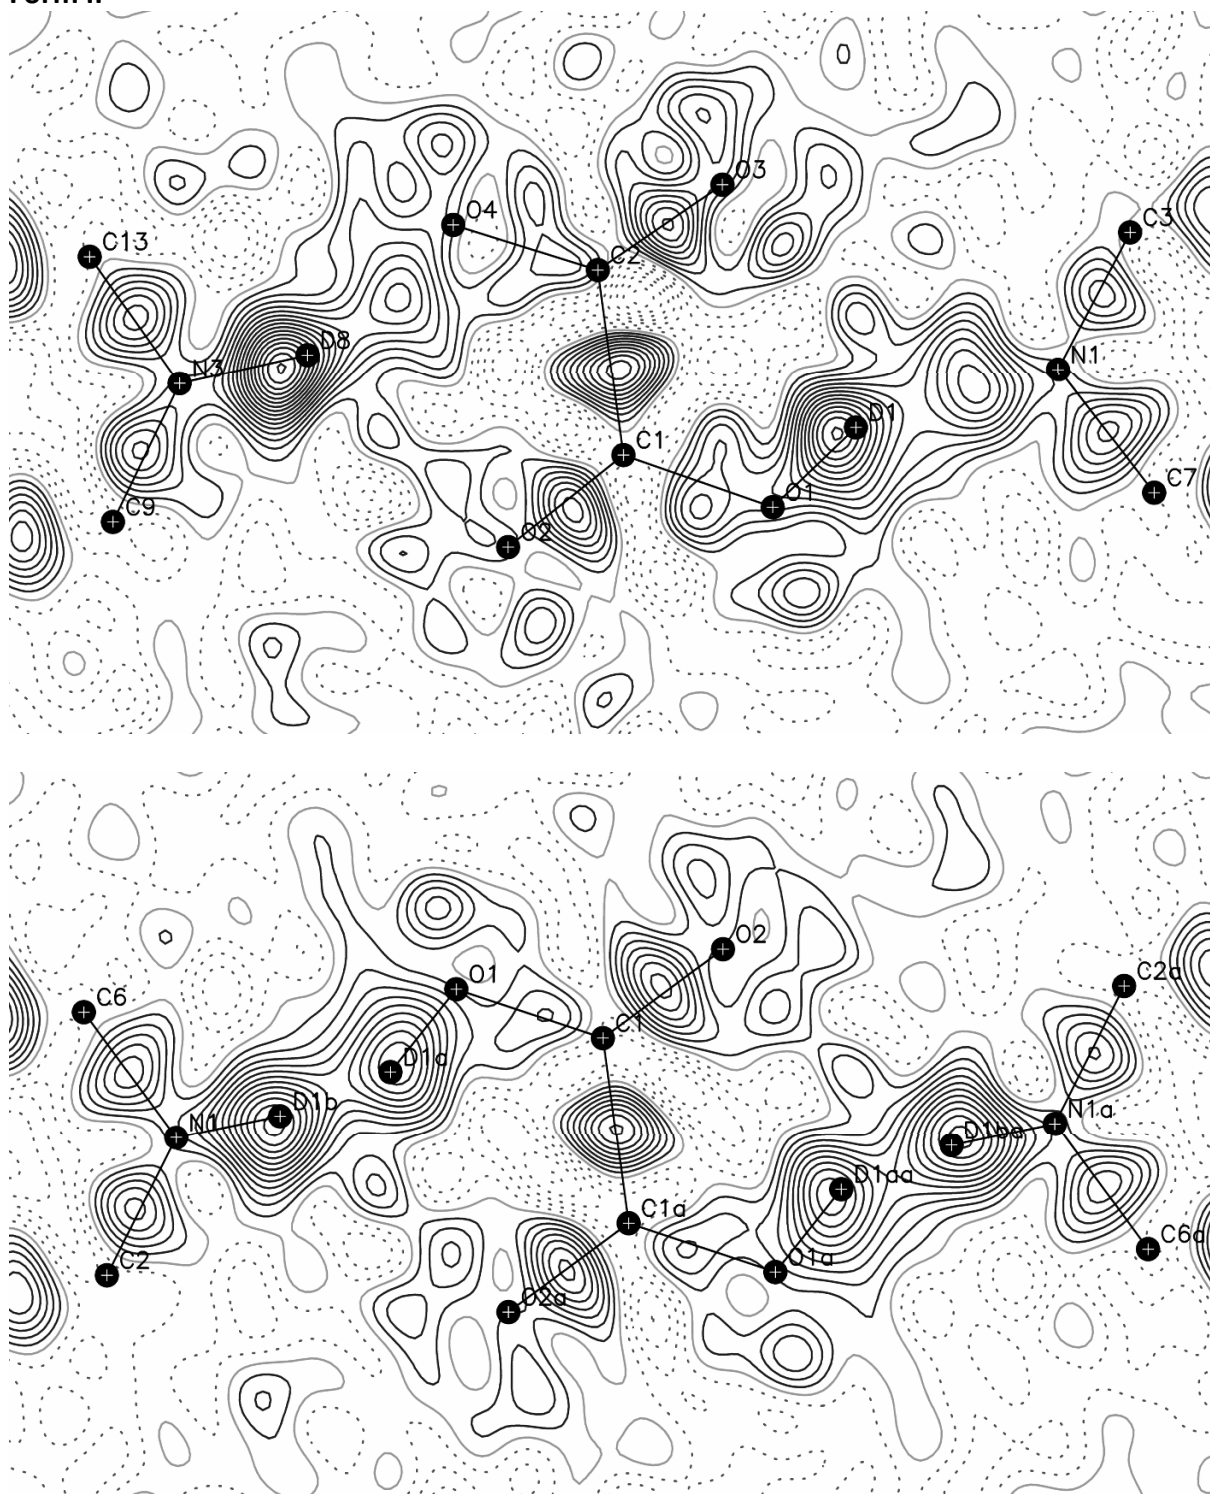

Difference Fourier maps of IN<sub>2</sub>-d-OA Form II in the OA plane after refinement in the (correct) supercell (top) and the (incorrect) small cell (bottom);  $\sin\theta/\lambda < 0.78 \text{ \AA}^{-1}$ . The correct supercell model shows that one D atom (D8) is fully transferred to the isonicotinamide moiety, while the other (D1) is retained by the oxalic acid; the lone pair density on N1 is also evident in this map. The incorrect 50:50 disorder model for the D1 atoms in the lower, small cell, map was forced by the wrong choice of cell, and led to poor modelling of the heavier atoms (evidenced by distorted ADPs; see Figure 5 of MS).

**Bond lengths in IN<sub>2</sub>-d-OA Forms I and II**

|                      |       | C~O / Å    |           | ∠CNC / °   |
|----------------------|-------|------------|-----------|------------|
| Form I               | C1-O1 | 1.2468(8)  | C2-N1-C6  | 122.40(6)  |
|                      | C1-O2 | 1.2626(8)  |           |            |
| Form II    supercell | C1-O1 | 1.3056(14) | C3-N1-C7  | 117.65(10) |
|                      | C1-O2 | 1.2181(14) |           |            |
|                      | C2-O3 | 1.2463(14) | C9-N3-C13 | 122.12(10) |
|                      | C2-O4 | 1.2506(14) |           |            |

C-O bond lengths and CNC bond angles in both polymorphic forms of IN<sub>2</sub>-d-OA
